# Supplementary material
Source: publisher figshare collection journal article supplement (https://acs.figshare.com/ndownloader/files/12945437)
Supplement: Supplementary file 1 [file 12945437]

## Supplementary Information

# Ascorbic acid-loaded apoferritin assisted carbon dots-MnO<sub>2</sub> nanocomposites for selective and sensitive detection of trypsin

*Qingqing Tan,<sup>‡,a</sup> Ruirui Zhang,<sup>‡,b</sup> Weisu Kong,<sup>a</sup> Fengli Qu,<sup>\*,a</sup> and Limin Lu<sup>\*,c</sup>*

<sup>a</sup> College of Chemistry and Chemical Engineering, Qufu Normal University, Qufu, Shandong 273165, P. R. China.

<sup>b</sup> Beijing Key Laboratory of Ionic Liquids Clean Process, CAS Key Laboratory of Green Process and Engineering, Institute of Process Engineering, Chinese Academy of Sciences, Beijing 100190, P. R. China.

<sup>c</sup> Institute of functional materials and agricultural applied chemistry, College of Science, Jiangxi Agricultural University, Nanchang 330045, P. R. China.

<sup>\*</sup> Corresponding authors.

*E-mail:* fenglquhn@hotmail.com (F. Qu), lulimin816@hotmail.com (L. Lu).

<sup>‡</sup> These authors contributed equally to this work.

## **Experimental Procedure**

### **Preparation of APOAA**

In particular, APO was dispersed in 2 mL of 10 mM PBS (pH 7.4) and the solution was adjusted to pH 2.0 with 0.1 M HCl solution under continuous stirring. The solution was further stirred for 30 min to make the APO completely disassociated. Then 100  $\mu$ L of 1.5 M AA solution was added into APO solution dropwise with stirring to allow AA to diffuse around the subunits of the APO. After that, the pH of solution was adjusted to 8.5 with 0.1 M NaOH. The obtained mixture was stirred for another 3 h at room temperature to allow AA enters the APO core. Subsequently, to remove free AA out of APO, the mixture solution was dialyzed against 10 mM PBS (pH 7.8) for 48 h using MD10 dialysis bag with a molecular weight cutoff (MWCO) of 8000-14000. The obtained APOAA solution was stored in amber glass bottles at 4 °C for further use.

### **Preparation of MnO<sub>2</sub> nanosheets**

MnCl<sub>2</sub> aqueous solution and tetramethylammonium hydroxide (TMAOH) containing 3 wt% of H<sub>2</sub>O<sub>2</sub> were mixed quickly and then stirred for 12 h at room temperature. The dried aggregates were washed with methanol and water several times, and following dried at 45 °C. Then the product dispersing in water and following sonicated for 12 h to get the resulting suspension (brown colloid).

## Figures and Tables

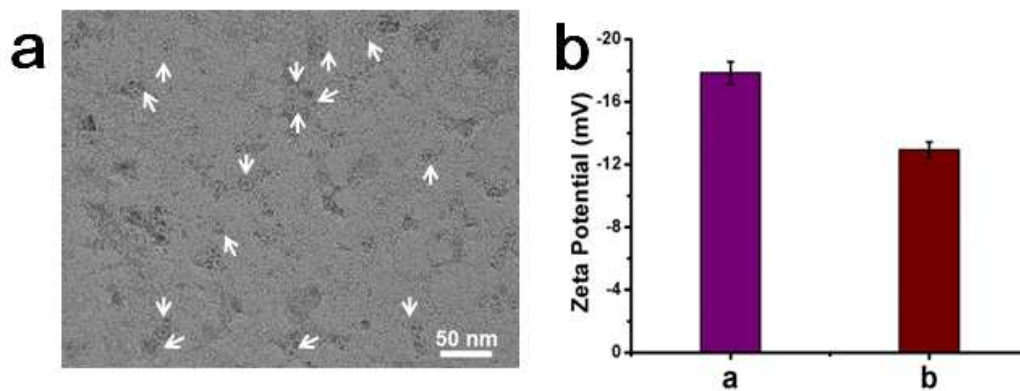

**Figure S1.** (a) TEM images of APOAA and (b) Zeta Potential of APO (column a) and APOAA (column b)

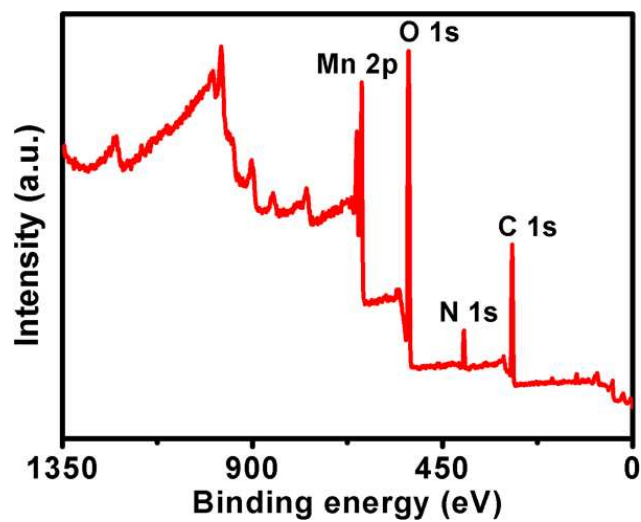

**Figure S2.** XPS survey spectrum of the CDs-MnO<sub>2</sub>

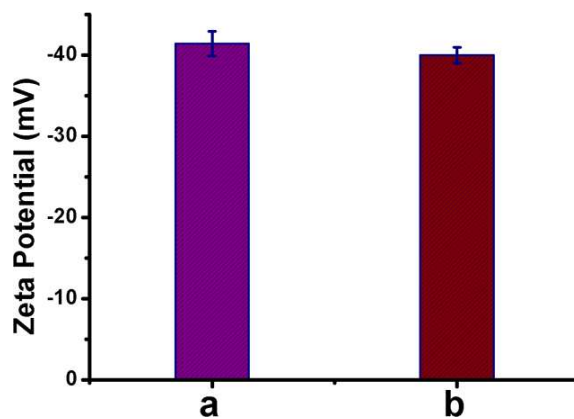

**Figure S3.** Zeta Potential of MnO<sub>2</sub> synthesized newly (column a) and stored for 6 months (column b)

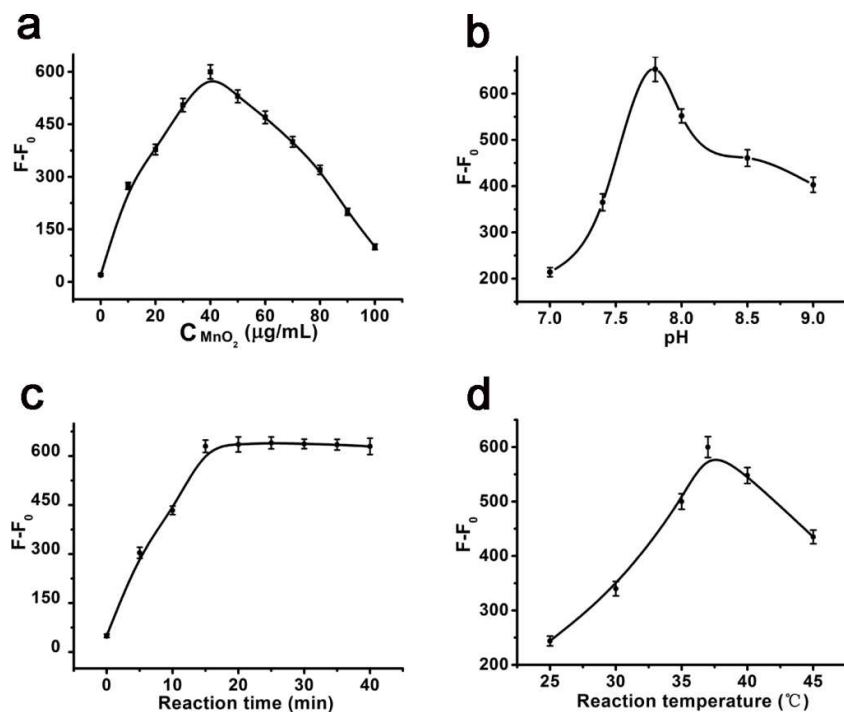

**Figure S4.** Dependence of the fluorescence recovery value of CMA on (a) MnO<sub>2</sub> nanosheets concentration (b) reaction pH (c) reaction time (d) reaction temperature (the concentration of trypsin is 300 ng/mL). The error bars were derived from the standard deviation of three measurements. Error bar = SD ( $n = 3$ ).  $F_0$  and  $F$  are the fluorescence intensities of CMA in the absence and presence of trypsin, respectively.

**Table S1** Comparison of this method with the newly reported approaches for trypsin determination.

| Materials             | Methods              | Linear range<br>(ng/mL)           | LOD<br>(ng/mL) | Ref.      |
|-----------------------|----------------------|-----------------------------------|----------------|-----------|
| Cytochrome c          | Chemiluminescence    | 0-100                             | 0.7            | [1]       |
| CdTe QDs              | Photoelectrochemical | 30-450                            | 2.7            | [2]       |
| Cytochrome c-Heme-TMB | Colorimetric         | 5-2000                            | 4.5            | [3]       |
| Au nanoclusters       | Colorimetric         | $9 \times 10^2$ - $1 \times 10^6$ | 600            | [4]       |
| Au nanoclusters       | Fluorescence         | $1 \times 10^4$ - $1 \times 10^8$ | 2              | [5]       |
| GFP                   | Fluorescence         | 0-400                             | 0.0282         | [6]       |
| CDs-MnO <sub>2</sub>  | Fluorescence         | 1-500                             | 0.3411         | This work |

GFP: green fluorescent protein

**Table S2** Recoveries results of the determination of trypsin in serum samples.

| Sample   | Added<br>(ng/mL) | Found<br>(ng/mL) | Recovery <sup>a</sup><br>(%) |
|----------|------------------|------------------|------------------------------|
| Sample 1 | 0                | 0                | -                            |
| Sample 2 | 50               | 48 ± 0.5         | 96                           |
| Sample 3 | 100              | 103 ± 0.4        | 103                          |
| Sample 4 | 200              | 196 ± 0.2        | 98                           |
| Sample 5 | 350              | 355 ± 0.3        | 101.4                        |
| Sample 6 | 450              | 446 ± 0.4        | 99.1                         |

<sup>a</sup> Mean value of three independent measurements.

## References

- [1] Zhang, Q.; Li, W.; Chen, J.; Wang, F.; Wang, Y.; Chen, Y.; Yu, C. An ultrasensitive chemiluminescence turn-on assay for protease and inhibitor screening with a natural substrate. *Chem. Commun.* **2013**, *49*, 3137-3139.
- [2] Chen, J.; Zhao, G. Nano-encapsulant of ascorbic acid-loaded apoferritin-assisted photoelectrochemical sensor for protease detection. *Talanta* **2017**, *168*, 62–66.

- [3] Zhang, L.; Du, J. A sensitive and label-free trypsin colorimetric sensor with cytochrome c as a substrate. *Biosens. Bioelectron.* **2016**, *79*, 347–352.
- [4] Wang, G.; Jin, L.; Dong, Y.; Wu, X.; Li, Z. Intrinsic enzyme mimicking activity of gold nanoclusters upon visible light triggering and its application for colorimetric trypsin detection. *Biosens. Bioelectron.* **2015**, *64*, 523–529.
- [5] Hu, L.; Han, S.; Parveen, S.; Yuan, Y.; Zhang, L.; Xu, G. Highly sensitive fluorescent detection of trypsin based on BSA-stabilized gold nanoclusters. *Biosens. Bioelectron.* **2012**, *32*, 297–299.
- [6] Huang, S.; Lia, F.; Liao, C.; Zheng, B.; Dua, J.; Xiao D. A selective and sensitive fluorescent probe for the determination of HAS and trypsin. *Talanta*, **2017**, *170*, 562–568.
